# Supplementary material
Source: PubMed Central journal article supplement (PMC5625380)
Supplement: JCM.00716-17_zjm999095650s1.pdf [file JCM.00716-17_zjm999095650s1.pdf]

1 **Supplementary materials**

2

3 **Accurate detection of methicillin-resistant *Staphylococcus aureus* in mixtures**  
4 **utilizing single bacterial duplex droplet digital PCR**

5 Jun Luo<sup>1,2</sup>, Junhua Li<sup>1</sup>, Hang Yang<sup>1</sup>, Junping Yu<sup>1</sup>, Hongping Wei<sup>1#</sup>

6 1.Key Laboratory of Special Pathogens and Biosafety, Wuhan Institute of Virology,  
7 Chinese Academy of Sciences, Wuhan 430071, China

8 2. University of Chinese Academy of Sciences, Beijing 100039, China

9 #To whom correspondence should be addressed.

10 Email: [hpwei@wh.iov.cn](mailto:hpwei@wh.iov.cn); Tel/Fax: +86 27 51861076

11

12

13

14

15

16

17

18

19

20

21

22

23 **Table S1** Bacteria strains used in this study.

| Organism group                     | Strain         | SCC <i>mec</i> type |
|------------------------------------|----------------|---------------------|
| MSSA                               | 91118          | —                   |
| MRSA                               | N315           | II                  |
|                                    | ZX3            | II                  |
|                                    | ZX108          | I                   |
|                                    | FY16           | III                 |
|                                    | WH70           | V                   |
|                                    | YN22           | IV                  |
|                                    | KQ6            | V                   |
|                                    | FY17           | III                 |
|                                    | ZX54           | IV                  |
| MR-CoNS ( <i>S. haemolyticus</i> ) | WH01           |                     |
| Control bacteria                   | <i>E. coil</i> | —                   |

24 —: not applicable ( no *mecA* gene)

25

26

27

28

29

30

31

32 **Table S2** The MRSA Index Ratio (MIR) of MRSA N315 under different concentrations.

33

| Sample N315              | Average <i>mecA</i> -<br>positive droplets No | Average <i>Nuc</i> -<br>positive droplets No | Average duplex<br>positive droplets No | MRSA Index Ratio |
|--------------------------|-----------------------------------------------|----------------------------------------------|----------------------------------------|------------------|
| 1x10 <sup>6</sup> CFU/mL | 7988                                          | 7562                                         | 6806                                   | 90±1.175         |
| 1x10 <sup>5</sup> CFU/mL | 629                                           | 607                                          | 548                                    | 90.26±0.13       |
| 1x10 <sup>4</sup> CFU/mL | 93                                            | 84                                           | 77                                     | 91.67±0.705      |
| 1x10 <sup>3</sup> CFU/mL | 4                                             | 4                                            | 4                                      | 100              |

34

35

36

37

38

39

40

41

42

43

44

45

46

47

48

49 **Table S3** The MRSA Index Ratio (MIR) of mixtures of MSSA and MR-CoNS under different

50 concentrations.

51

| Mixture No | Average positive droplets                                          | <i>mecA</i> - No | Average <i>Nuc</i> - droplets No | positive | Average positive droplets No | duplex droplets | MRSA Ratio | Index |
|------------|--------------------------------------------------------------------|------------------|----------------------------------|----------|------------------------------|-----------------|------------|-------|
| 1          | 1 x 10 <sup>6</sup> CFU/mL WH01 + 1 x 10 <sup>6</sup> CFU/mL 91118 |                  |                                  |          |                              |                 |            |       |
|            | 2919                                                               |                  | 5141                             |          | 952                          |                 | 29.48±4.07 |       |
| 2          | 1 x 10 <sup>5</sup> CFU/mL WH01+ 1 x 10 <sup>5</sup> CFU/mL 91118  |                  |                                  |          |                              |                 |            |       |
|            | 240                                                                |                  | 679                              |          | 16                           |                 | 6.75±0.95  |       |
| 3          | 1 x 10 <sup>4</sup> CFU/mL WH01+ 1 x 10 <sup>4</sup> CFU/mL 91118  |                  |                                  |          |                              |                 |            |       |
|            | 45                                                                 |                  | 77                               |          | 0                            |                 | 0          |       |
| 4          | 1 x 10 <sup>3</sup> CFU/mL WH01+ 1 x 10 <sup>3</sup> CFU/mL 91118  |                  |                                  |          |                              |                 |            |       |
|            | 1                                                                  |                  | 2                                |          | 0                            |                 | 0          |       |
| 5          | 1 x 10 <sup>6</sup> CFU/mL WH01+ 1 x 10 <sup>5</sup> CFU/mL 91118  |                  |                                  |          |                              |                 |            |       |
|            | 1696                                                               |                  | 253                              |          | 52                           |                 | 20.74±1.56 |       |
| 6          | 1 x 10 <sup>6</sup> CFU/mL WH01+ 1 x 10 <sup>4</sup> CFU/mL 91118  |                  |                                  |          |                              |                 |            |       |
|            | 2575                                                               |                  | 76                               |          | 14                           |                 | 18.24±1.24 |       |
| 7          | 1 x 10 <sup>6</sup> CFU/mL WH01+ 1 x 10 <sup>3</sup> CFU/mL 91118  |                  |                                  |          |                              |                 |            |       |
|            | 2511                                                               |                  | 6                                |          | 0                            |                 | 0          |       |
| 8          | 1 x 10 <sup>5</sup> CFU/mL WH01+ 1 x 10 <sup>4</sup> CFU/mL 91118  |                  |                                  |          |                              |                 |            |       |
|            | 322                                                                |                  | 144                              |          | 3                            |                 | 2.1±0.45   |       |
| 9          | 1 x 10 <sup>5</sup> CFU/mL WH01+ 1 x 10 <sup>3</sup> CFU/mL 91118  |                  |                                  |          |                              |                 |            |       |
|            | 349                                                                |                  | 7                                |          | 0                            |                 | 0          |       |
| 10         | 1 x 10 <sup>4</sup> CFU/mL WH01+ 1 x 10 <sup>3</sup> CFU/mL 91118  |                  |                                  |          |                              |                 |            |       |
|            | 56                                                                 |                  | 2                                |          | 0                            |                 | 0          |       |
| 11         | 1 x 10 <sup>5</sup> CFU/mL WH01+ 1 x 10 <sup>6</sup> CFU/mL 91118  |                  |                                  |          |                              |                 |            |       |
|            | 661                                                                |                  | 4140                             |          | 142                          |                 | 21.48±1.24 |       |
| 12         | 1 x 10 <sup>4</sup> CFU/mL WH01+ 1 x 10 <sup>6</sup> CFU/mL 91118  |                  |                                  |          |                              |                 |            |       |
|            | 85                                                                 |                  | 4160                             |          | 19                           |                 | 22.29±1.13 |       |
| 13         | 1 x 10 <sup>3</sup> CFU/mL WH01+ 1 x 10 <sup>6</sup> CFU/mL 91118  |                  |                                  |          |                              |                 |            |       |
|            | 3                                                                  |                  | 1920                             |          | 0                            |                 | 0          |       |
| 14         | 1 x 10 <sup>4</sup> CFU/mL WH01+ 1 x 10 <sup>5</sup> CFU/mL 91118  |                  |                                  |          |                              |                 |            |       |
|            | 68                                                                 |                  | 557                              |          | 2                            |                 | 2.9±0.6    |       |
| 15         | 1 x 10 <sup>3</sup> CFU/mL WH01+ 1 x 10 <sup>5</sup> CFU/mL 91118  |                  |                                  |          |                              |                 |            |       |
|            | 8                                                                  |                  | 1426                             |          | 0                            |                 | 0          |       |
| 16         | 1 x 10 <sup>3</sup> CFU/mL WH01+ 1 x 10 <sup>4</sup> CFU/mL 91118  |                  |                                  |          |                              |                 |            |       |
|            | 4                                                                  |                  | 20                               |          | 0                            |                 | 0          |       |

52

53

54 **Table S4** The detection results of the duplex ddPCR and the duplex qPCR for 104 nasal specimens.

| Sample    | qPCR (Ct)    |              | Result   | ddPCR (droplet) |             |               | MRSA ratio   | Result   | Culture result |
|-----------|--------------|--------------|----------|-----------------|-------------|---------------|--------------|----------|----------------|
|           | <i>mecA</i>  | <i>nuc</i>   |          | <i>mecA</i>     | <i>nuc</i>  | Dual positive |              |          |                |
| 1         | -            | -            | -        | 9               | 0           | 0             | 0            | -        | -              |
| 2         | 36.71        | -            | -        | 34              | 1           | 0             | 0            | -        | -              |
| <b>3</b>  | <b>32.91</b> | <b>-</b>     | <b>-</b> | <b>1410</b>     | <b>8</b>    | <b>6</b>      | <b>75</b>    | <b>+</b> | <b>+</b>       |
| 4         | 34.02        | -            | -        | 30              | 4           | 0             | 0            | -        | -              |
| 5         | 31.21        | -            | -        | 209             | 2           | 0             | 0            | -        | -              |
| 6         | 31.29        | -            | -        | 127             | 2           | 0             | 0            | -        | -              |
| <b>7</b>  | <b>33.41</b> | <b>33.59</b> | <b>+</b> | <b>160</b>      | <b>84</b>   | <b>82</b>     | <b>97.6</b>  | <b>+</b> | <b>+</b>       |
| 8         | 37.16        | -            | -        | 14              | 2           | 0             | 0            | -        | -              |
| 9         | -            | -            | -        | 3               | 2           | 0             | 0            | -        | -              |
| 10        | -            | -            | -        | 6               | 4           | 0             | 0            | -        | -              |
| <b>11</b> | <b>-</b>     | <b>-</b>     | <b>-</b> | <b>2</b>        | <b>2</b>    | <b>2</b>      | <b>100</b>   | <b>+</b> | <b>+</b>       |
| 12        | -            | -            | -        | 0               | 0           | 0             | 0            | -        | -              |
| <b>13</b> | <b>34.72</b> | <b>35.91</b> | <b>+</b> | <b>13</b>       | <b>5</b>    | <b>0</b>      | <b>0</b>     | <b>-</b> | <b>-</b>       |
| <b>14</b> | <b>29.98</b> | <b>32.37</b> | <b>+</b> | <b>3052</b>     | <b>1542</b> | <b>1483</b>   | <b>96.2</b>  | <b>+</b> | <b>+</b>       |
| <b>15</b> | <b>32.01</b> | <b>32.51</b> | <b>+</b> | <b>463</b>      | <b>450</b>  | <b>379</b>    | <b>84.22</b> | <b>+</b> | <b>+</b>       |
| 16        | 37.39        | -            | -        | 0               | 0           | 0             | 0            | -        | -              |
| 17        | -            | -            | -        | 2               | 0           | 0             | 0            | -        | -              |
| 18        | -            | -            | -        | 3               | 3           | 0             | 0            | -        | -              |
| <b>19</b> | <b>-</b>     | <b>-</b>     | <b>-</b> | <b>1</b>        | <b>1</b>    | <b>1</b>      | <b>100</b>   | <b>+</b> | <b>+</b>       |
| 20        | 37.67        | -            | -        | 0               | 0           | 0             | 0            | -        | -              |
| 21        | -            | -            | -        | 0               | 0           | 0             | 0            | -        | -              |
| 22        | -            | -            | -        | 1               | 0           | 0             | 0            | -        | -              |
| 23        | -            | -            | -        | 1               | 0           | 0             | 0            | -        | -              |
| <b>24</b> | <b>35.17</b> | <b>-</b>     | <b>-</b> | <b>195</b>      | <b>1</b>    | <b>1</b>      | <b>100</b>   | <b>+</b> | <b>+</b>       |
| <b>25</b> | <b>35.6</b>  | <b>37.83</b> | <b>+</b> | <b>10</b>       | <b>8</b>    | <b>0</b>      | <b>0</b>     | <b>-</b> | <b>-</b>       |
| 26        | -            | -            | -        | 0               | 3           | 0             | 0            | -        | -              |
| 27        | 33.77        | -            | -        | 87              | 0           | 0             | -            | -        | -              |
| 28        | -            | -            | -        | 1               | 1           | 0             | -            | -        | -              |
| 29        | 34.13        | -            | -        | 69              | 1           | 0             | -            | -        | -              |
| 30        | 36.01        | -            | -        | 9               | 0           | 0             | -            | -        | -              |
| 31        | -            | -            | -        | 0               | 2           | 0             | -            | -        | -              |
| 32        | 37.12        | -            | -        | 7               | 3           | 0             | -            | -        | -              |
| <b>33</b> | <b>34.35</b> | <b>-</b>     | <b>-</b> | <b>117</b>      | <b>3</b>    | <b>2</b>      | <b>66.67</b> | <b>+</b> | <b>+</b>       |
| 34        | -            | -            | -        | 21              | 1           | 0             | -            | -        | -              |
| 35        | -            | -            | -        | 0               | 0           | 0             | -            | -        | -              |
| 36        | 35.74        | -            | -        | 14              | 5           | 0             | -            | -        | -              |
| 37        | 30.32        | -            | -        | 292             | 1           | 0             | -            | -        | -              |
| 38        | -            | -            | -        | 0               | 6           | 0             | -            | -        | -              |

|            |              |              |          |              |           |           |              |          |          |
|------------|--------------|--------------|----------|--------------|-----------|-----------|--------------|----------|----------|
| 39         | -            | -            | -        | 3            | 0         | 0         | -            | -        | -        |
| 40         | 34.01        | -            | -        | 15           | 0         | 0         | -            | -        | -        |
| <b>41</b>  | <b>30.95</b> | <b>37.74</b> | <b>+</b> | <b>51</b>    | <b>9</b>  | <b>8</b>  | <b>88.89</b> | <b>+</b> | <b>+</b> |
| 42         | 33.94        | -            | -        | 21           | 3         | 0         | -            | -        | -        |
| 43         | 32.18        | -            | -        | 33           | 0         | 0         | -            | -        | -        |
| 44         | -            | -            | -        | 3            | 0         | 0         | -            | -        | -        |
| <b>45</b>  | <b>31.14</b> | <b>-</b>     | <b>-</b> | <b>55</b>    | <b>2</b>  | <b>2</b>  | <b>100</b>   | <b>+</b> | <b>+</b> |
| 46         | -            | -            | -        | 0            | 0         | 0         | -            | -        | -        |
| 47         | -            | -            | -        | 0            | 0         | 0         | -            | -        | -        |
| 48         | 31.62        | -            | -        | 26           | 1         | 0         | -            | -        | -        |
| <b>49</b>  | <b>30.38</b> | <b>-</b>     | <b>-</b> | <b>107</b>   | <b>3</b>  | <b>3</b>  | <b>100</b>   | <b>+</b> | <b>+</b> |
| 50         | 36.89        | -            | -        | 4            | 0         | 0         | -            | -        | -        |
| 51         | 35.14        | -            | -        | 8            | 2         | 0         | -            | -        | -        |
| 52         | 33.21        | -            | -        | 7            | 0         | 0         | -            | -        | -        |
| 53         | -            | -            | -        | 2            | 1         | 0         | -            | -        | -        |
| 54         | 36.56        | -            | -        | 6            | 2         | 0         | -            | -        | -        |
| 55         | -            | -            | -        | 3            | 0         | 0         | -            | -        | -        |
| 56         | -            | -            | -        | 0            | 0         | 0         | -            | -        | -        |
| 57         | -            | -            | -        | 1            | 0         | 0         | -            | -        | -        |
| 58         | -            | -            | -        | 4            | 3         | 0         | -            | -        | -        |
| 59         | -            | -            | -        | 1            | 3         | 0         | -            | -        | -        |
| 60         | -            | -            | -        | 0            | 0         | 0         | -            | -        | -        |
| 61         | -            | -            | -        | 10           | 0         | 0         | -            | -        | -        |
| 62         | -            | -            | -        | 4            | 0         | 0         | -            | -        | -        |
| 63         | 32.96        | -            | -        | 33           | 1         | 0         | -            | -        | -        |
| 64         | -            | -            | -        | 1            | 1         | 0         | -            | -        | -        |
| 65         | -            | -            | -        | 0            | 1         | 0         | -            | -        | -        |
| 66         | 31.71        | -            | -        | 238          | 1         | 0         | -            | -        | -        |
| 67         | -            | -            | -        | 1            | 1         | 0         | -            | -        | -        |
| <b>68*</b> | <b>24.6</b>  | <b>-</b>     | <b>-</b> | <b>10374</b> | <b>10</b> | <b>10</b> | <b>.*</b>    | <b>-</b> | <b>-</b> |
| 69         | 37.95        | -            | -        | 3            | 0         | 0         | -            | -        | -        |
| 70         | 32.12        | -            | -        | 143          | 0         | 0         | -            | -        | -        |
| 71         | -            | -            | -        | 8            | 0         | 0         | -            | -        | -        |
| <b>72</b>  | <b>36.14</b> | <b>-</b>     | <b>-</b> | <b>18</b>    | <b>4</b>  | <b>1</b>  | <b>25</b>    | <b>+</b> | <b>+</b> |
| 73         | -            | -            | -        | 0            | 4         | 0         | -            | -        | -        |
| <b>74</b>  | <b>31.48</b> | <b>35.41</b> | <b>+</b> | <b>231</b>   | <b>60</b> | <b>17</b> | <b>28.33</b> | <b>+</b> | <b>+</b> |
| 75         | -            | -            | -        | 1            | 4         | 0         | -            | -        | -        |
| <b>76</b>  | <b>34.03</b> | <b>37.99</b> | <b>+</b> | <b>31</b>    | <b>7</b>  | <b>1</b>  | <b>14.28</b> | <b>+</b> | <b>+</b> |
| 77         | -            | -            | -        | 1            | 2         | 0         | -            | -        | -        |
| 78         | 29.56        | -            | -        | 158          | 2         | 0         | -            | -        | -        |
| 79         | 31.12        | -            | -        | 59           | 0         | 0         | -            | -        | -        |
| 80         | -            | -            | -        | 0            | 0         | 0         | -            | -        | -        |
| 81         | -            | -            | -        | 0            | 0         | 0         | -            | -        | -        |
| <b>82</b>  | <b>-</b>     | <b>-</b>     | <b>-</b> | <b>4</b>     | <b>3</b>  | <b>3</b>  | <b>100</b>   | <b>+</b> | <b>+</b> |

|           |              |              |          |            |           |          |            |          |          |
|-----------|--------------|--------------|----------|------------|-----------|----------|------------|----------|----------|
| <b>83</b> | <b>36.21</b> | <b>36.65</b> | <b>+</b> | <b>11</b>  | <b>10</b> | <b>7</b> | <b>70</b>  | <b>+</b> | <b>+</b> |
| 84        | -            | -            | -        | 2          | 1         | 0        | -          | -        | -        |
| 85        | 35.1         | -            | -        | 29         | 0         | 0        | -          | -        | -        |
| 86        | -            | -            | -        | 6          | 0         | 0        | -          | -        | -        |
| 87        | 35.62        | -            | -        | 11         | 0         | 0        | -          | -        | -        |
| 88        | -            | -            | -        | 3          | 0         | 0        | -          | -        | -        |
| 89        | -            | -            | -        | 1          | 4         | 0        | -          | -        | -        |
| 90        | 37.19        | -            | -        | 8          | 0         | 0        | -          | -        | -        |
| 91        | 31.91        | -            | -        | 157        | 0         | 0        | -          | -        | -        |
| 92        | -            | -            | -        | 5          | 0         | 0        | -          | -        | -        |
| <b>93</b> | <b>-</b>     | <b>-</b>     | <b>-</b> | <b>5</b>   | <b>7</b>  | <b>3</b> | <b>60</b>  | <b>+</b> | <b>+</b> |
| 94        | 31.56        | -            | -        | 230        | 0         | 0        | -          | -        | -        |
| 95        | 32.79        | -            | -        | 151        | 0         | 0        | -          | -        | -        |
| <b>96</b> | <b>32.61</b> | <b>-</b>     | <b>-</b> | <b>145</b> | <b>1</b>  | <b>1</b> | <b>100</b> | <b>+</b> | <b>+</b> |
| 97        | -            | -            | -        | 1          | 1         | 0        | -          | -        | -        |
| 98        | -            | -            | -        | 1          | 0         | 0        | -          | -        | -        |
| 99        | -            | -            | -        | 1          | 1         | 0        | -          | -        | -        |
| 100       | 37.23        | -            | -        | 11         | 1         | 0        | -          | -        | -        |
| 101       | -            | -            | -        | 1          | 1         | 0        | -          | -        | -        |
| 102       | 31.98        | -            | -        | 125        | 5         | 0        | -          | -        | -        |
| 103       | -            | -            | -        | 2          | 0         | 0        | -          | -        | -        |
| 104       | 33.1         | -            | -        | 101        | 1         | 0        | -          | -        | -        |

55 **Note:** “-“ means no signal (for qPCR) or MRSA negative result. “+“ means MRSA positive result.

56 **\*: Specimen 68 was diluted 10 times for determining the MIR in the ddPCR assay.**

57

58

59

60

61

62

63

64

65

66

67

68

69

70

71

72

73

74 Fig.S1

A

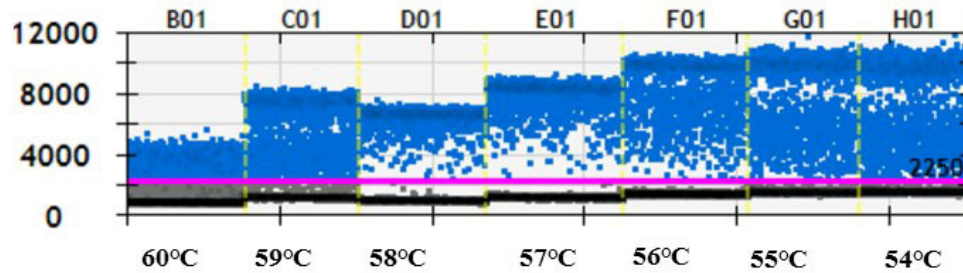

B

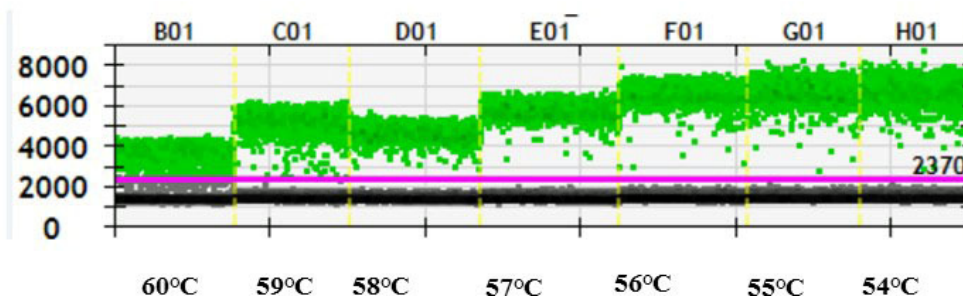

75

76 Fig.S1 One-dimensional (1D) plots of the duplex ddPCR assay under different annealing

77 temperatures (54–60°C). MRSA strain N315 ( $1 \times 10^7$  CFU/mL) is used as the template (*A. mecA*

78 gene and *B. nuc* gene). Each point represents a droplet with a given fluorescence level and the

79 droplet colors indicate which target was amplified. The x-axis shows various temperature, and the

80 y-axis represents the fluorescence amplitude.

81

82

83

84

85

86

87

88

89

90

91

92



93

94 Fig.S2

95

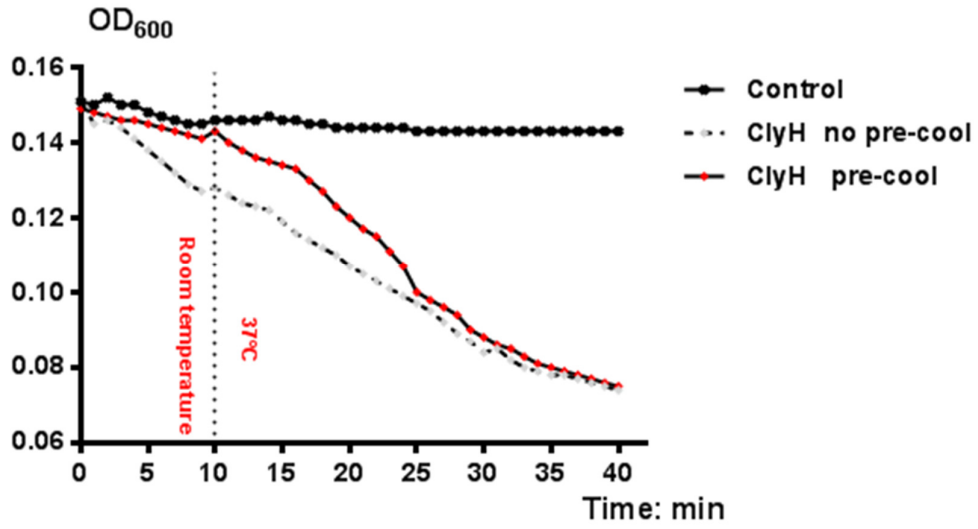

96

97 Fig. S2 The activity changes of ClyH after cooling on ice. The concentration of ClyH:

98 10 µg/mL.

99

100

101

102

103

104

105

106

107

108

109

110

111

112

113

114

115

116

117

118

119

120  
121  
122

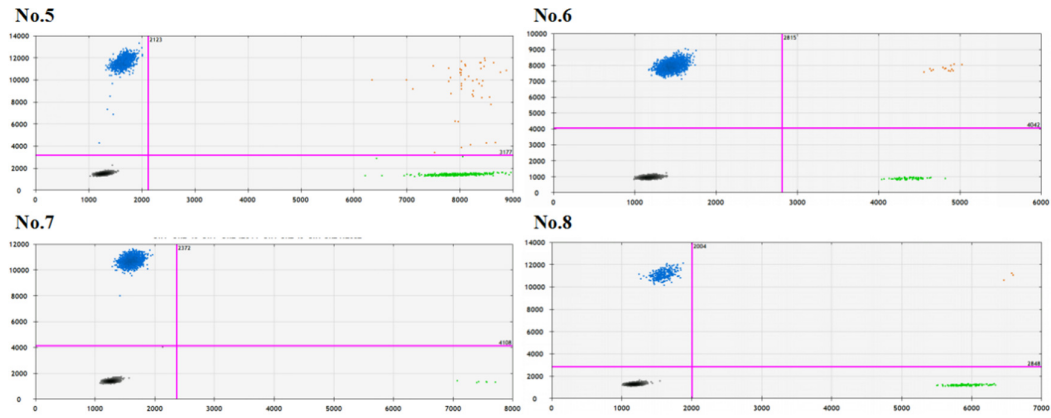

123

124 **Fig. S3** Two-dimensional (2D) plots of the duplex ddPCR for detection of the mixture of  
125 MSSA(91118) and MR-CoNS under different concentrations (Sample No 5 - No 8 are as shown in  
126 Table S3). The x-axis shows the fluorescence amplitude corresponding to the HEX fluorophore  
127 (*nuc*), and the y-axis represents the fluorescence amplitude corresponding to the FAM fluorophore  
128 (*mecA*). Each point represents a droplet with a given fluorescence level and the droplet colors  
129 indicate which target was amplified (blue: *mecA* positive; green: *nuc* positive; black: negative,  
130 Orange: both *nuc* and *mecA* positive).

131

132

133

134

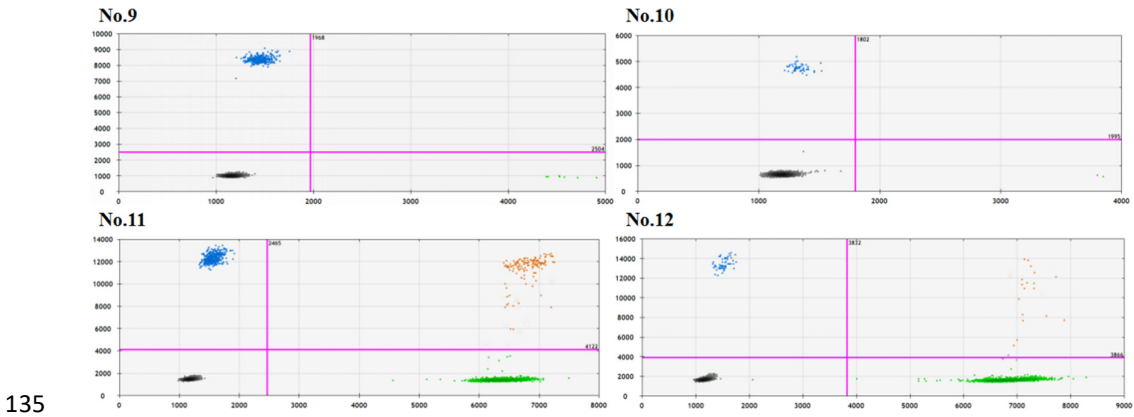

135

136 **Fig. S4** Two-dimensional (2D) plots of the duplex ddPCR for detection of the mixture of  
 137 MSSA(91118) and MR-CoNS under different concentrations (Sample No 9 - No 12 are as shown  
 138 in Table S3). The x-axis shows the fluorescence amplitude corresponding to the HEX fluorophore  
 139 (*nuc*), and the y-axis represents the fluorescence amplitude corresponding to the FAM fluorophore  
 140 (*mecA*). Each point represents a droplet with a given fluorescence level and the droplet colors  
 141 indicate which target was amplified (blue: *mecA* positive; green: *nuc* positive; black: negative,  
 142 Orange: both *nuc* and *mecA* positive).

143

144

145

146

147

148

149

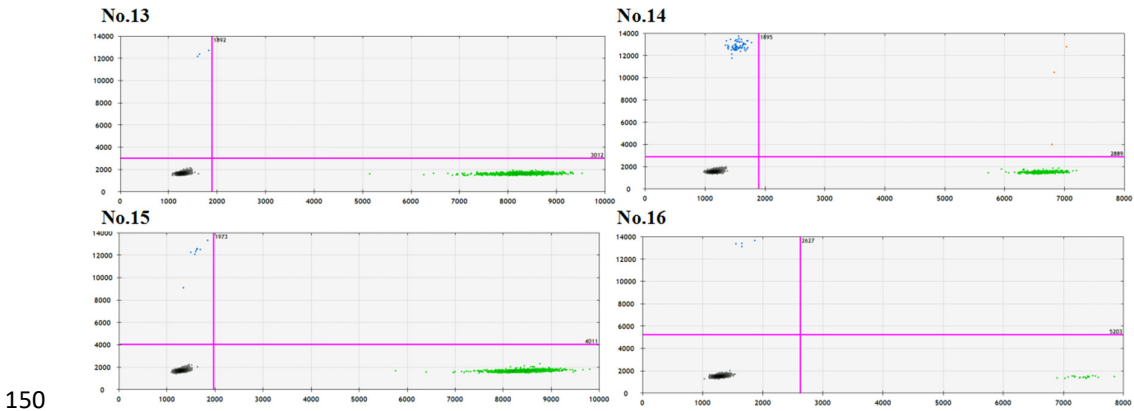

150

151 **Fig. S5** Two-dimensional (2D) plots of the duplex ddPCR for detection of the mixture of  
 152 MSSA(91118) and MR-CoNS under different concentrations (Sample No 13 - No 16 are as shown  
 153 in Table S3). The x-axis shows the fluorescence amplitude corresponding to the HEX fluorophore  
 154 (*nuc*), and the y-axis represents the fluorescence amplitude corresponding to the FAM fluorophore  
 155 (*mecA*). Each point represents a droplet with a given fluorescence level and the droplet colors  
 156 indicate which target was amplified (blue: *mecA* positive; green: *nuc* positive; black: negative,  
 157 Orange: both *nuc* and *mecA* positive).

158

159

160
